# Supplementary material
Source: publisher figshare collection journal article supplement (https://tandf.figshare.com/articles/dataset/_/14963524)

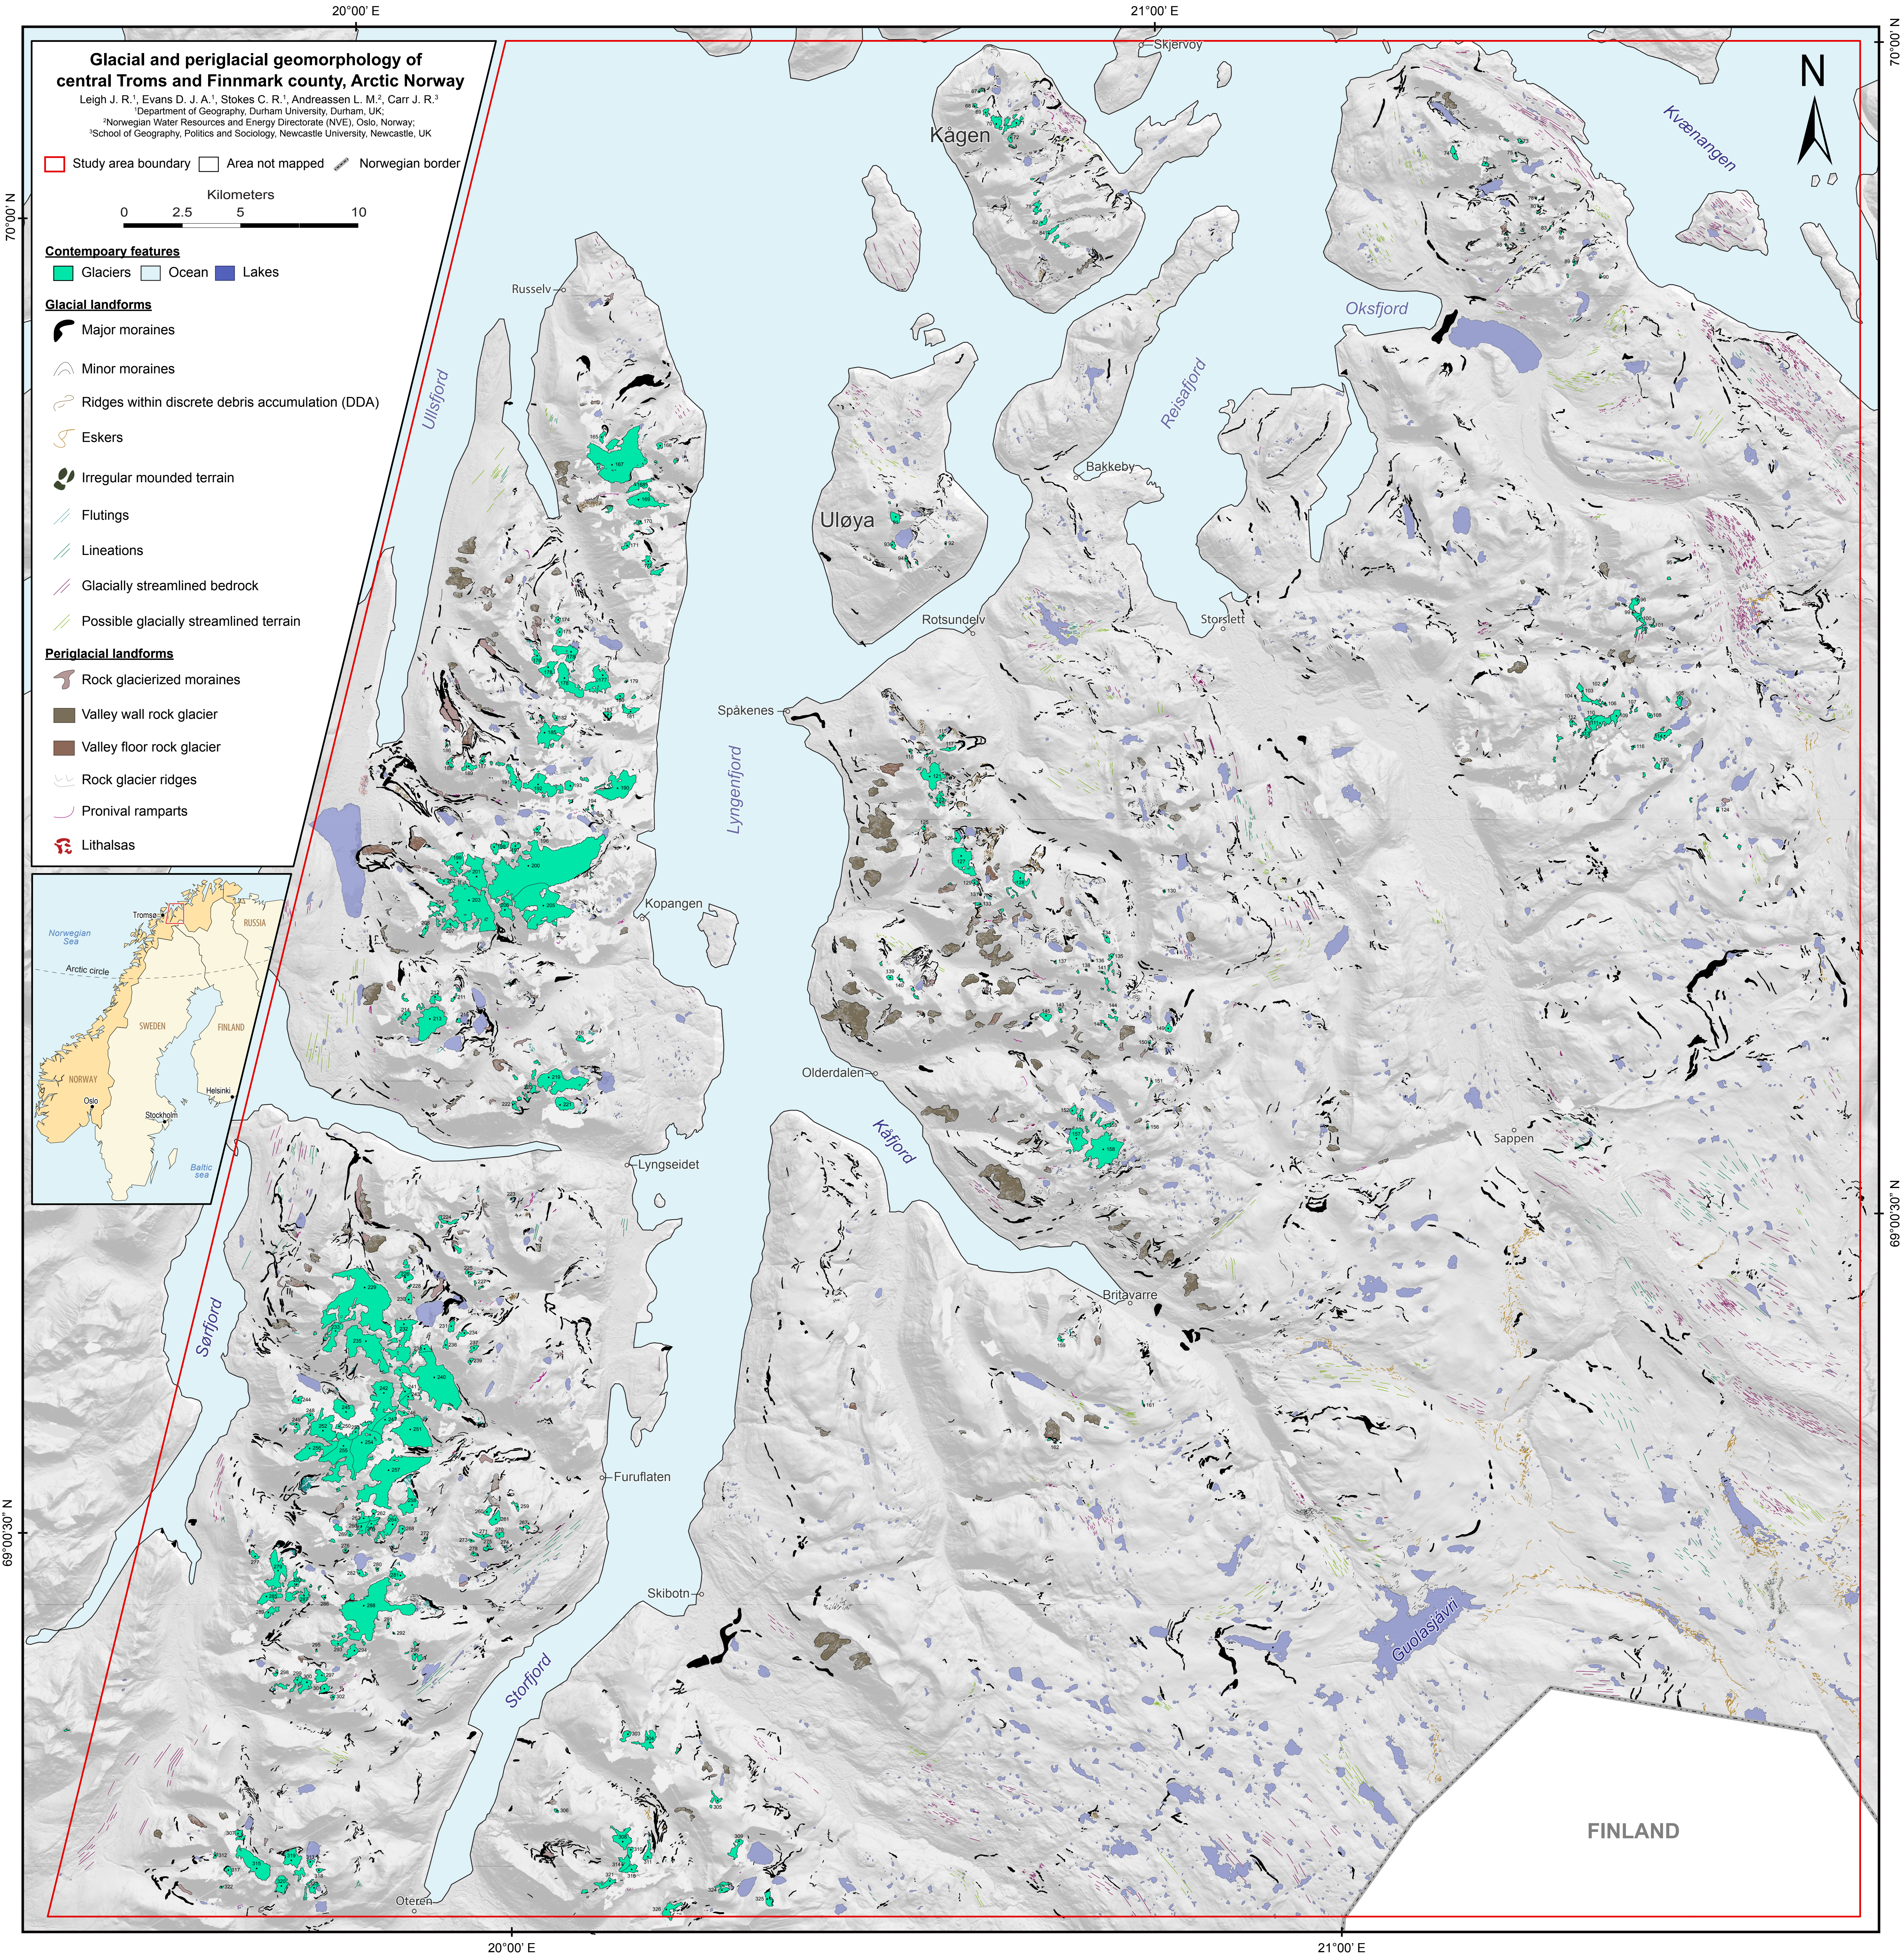

Supplement: Supplementary file 1 [file 3]
